# Supplementary material for: Inspired from Spiro-OMeTAD: developing ambipolar spirobifluorene derivatives as effective passivation molecules for perovskite solar cells
Source: Royal Society of Chemistry journal article supplement (doi:10.1039/d1tc04925a), 2021-12-07
Supplement: d1tc04925a1.pdf [file d1tc04925a1.pdf]

# Inspired from Spiro-OMeTAD: Developing Ambipolar Spirobifluorene Derivatives as Effective Passivation Molecules of Perovskite Solar Cells

*Teng Zhang,<sup>a\*#</sup> Baohua Zhao,<sup>b#</sup> Zhi Li,<sup>c</sup> Shanshan Liu,<sup>b</sup> Chengben Liu,<sup>b</sup> Xinmei Li,<sup>a</sup>*

*Heyuan Liu,<sup>a</sup> Yanli Chen,<sup>a</sup> Zhaobin Liu<sup>c</sup> and Xiyou Li<sup>a\*</sup>*

<sup>a</sup>. School of Materials Science and Engineering, China University of Petroleum (East China), Qingdao, 266580 P. R. China. E-mail: xiyouli@upc.edu.cn; tzhangae@connect.ust.hk

<sup>b</sup>. College of Science, China University of Petroleum (East China), Qingdao, 266580 P. R. China.

<sup>c</sup>. Shandong Energy Group Co., Ltd., 19/F, high salary Wanda J3 office building, 57-1, Gongye South Road, High tech Zone, Jinan City, Shandong Province, China.

<sup>#</sup> T. Zhang and B. Zhao contributed equally to the work

## Synthesis section

### Synthesis of BSBF-NH<sub>2</sub>

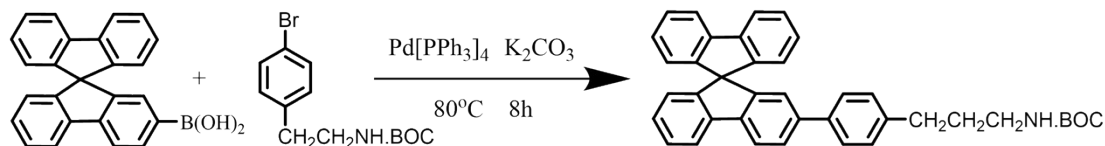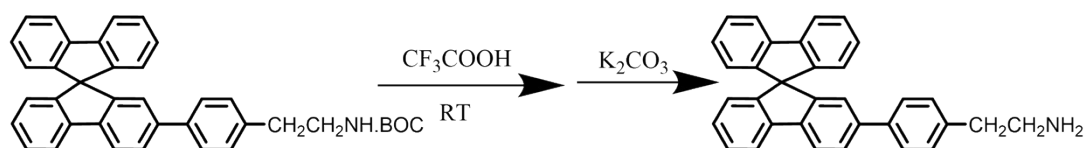

2-ylboronic acid-9,9'-spirobifluorene (144.08 mg, 0.4 mmol), tert-Butyl(4-bromophenyl)carbamate (100 mg, 0.33 mmol), Pd(PPh<sub>3</sub>)<sub>4</sub> (15.430 mg, 0.013 mmol) and K<sub>2</sub>CO<sub>3</sub> (110.6 mg, 0.803 mmol) were dissolved in the tetrahydrofuran (15 mL). The mixture was sealed in a vial tube under N<sub>2</sub> and stirred at 80°C for 8 h in a microwave reactor. After the reaction, the mixture was poured into 50 mL CH<sub>2</sub>Cl<sub>2</sub> and washed with water (100 mL × 3). The organic layer was collected and dried over anhydrous Na<sub>2</sub>SO<sub>4</sub> and evaporated under reduced pressure. The crude product was purified using silica gel column chromatography (CH<sub>2</sub>Cl<sub>2</sub>). After removing CH<sub>2</sub>Cl<sub>2</sub> under reduced pressure, the colorless solid (1) was obtained. Under N<sub>2</sub> atmosphere, trifluoroacetic acid (TFA, 1.2 mL) was added to the solution of (1) (185.11 mg, 0.320 mmol) in CH<sub>2</sub>Cl<sub>2</sub> (8 mL). The mixture was stirred at RT for 4 h. After the reaction, the solvents were removed under reduced pressure. 5% Na<sub>2</sub>CO<sub>3</sub> aqueous solution (8 mL) and CH<sub>2</sub>Cl<sub>2</sub> (6.5 mL) were added to the crude product, and the reaction was kept at RT for 6 h. The organic layer was collected and dried over anhydrous Na<sub>2</sub>SO<sub>4</sub> and evaporated under reduced pressure. The precipitate was collected and washed with

$\text{CHCl}_2$  and ethanol. The pale yellow solid was dried under reduced pressure at  $60^\circ\text{C}$ .

Yield: 262 mg, 73%.  $^1\text{H NMR}$  (300 MHz,  $\text{CDCl}_3$ , TMS):  $\delta = 2.82$  (t, 2H), 2.99(s, 2H), 7.15(t, 3H), 7.23(d, 2H), 7.40-7.44(m, 5H), 7.72(d, 3H), 8.05-8.07(m, 2H), 8.12(d, 1H).

### Synthesis of BSBF-COOH

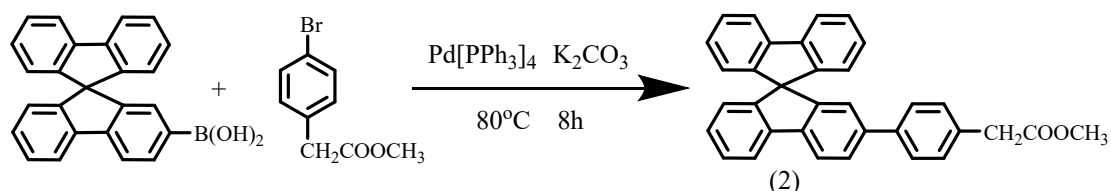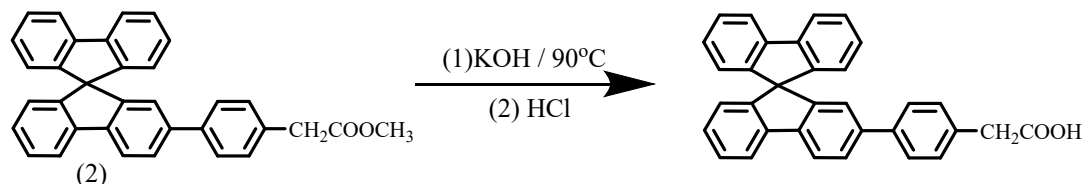

3-ylboronic acid-9,9'-spirobifluorene (144.08 mg, 0.4 mmol), methyl 2-(4-bromophenyl)acetate (75.57 mg, 0.33 mmol),  $\text{Pd}(\text{PPh}_3)_4$  (15.430 mg, 0.013 mmol) and  $\text{K}_2\text{CO}_3$  (110.6 mg, 0.803 mmol) were dissolved in the tetrahydrofuran (15 mL). The mixture was sealed in a vial tube under  $\text{N}_2$  and stirred at  $80^\circ\text{C}$  for 8 h in a microwave reactor. After the reaction, the mixture was poured into 50 mL  $\text{CH}_2\text{Cl}_2$  and washed with water (100 mL $\times$ 3). The organic layer was collected and dried over anhydrous  $\text{Na}_2\text{SO}_4$  and evaporated under reduced pressure. The crude product was purified using silica gel column chromatography ( $\text{CH}_2\text{Cl}_2$ ). After removing  $\text{CH}_2\text{Cl}_2$  under reduced pressure, the colorless solid (2) was obtained. Add product (2) to methanol dioxane mixed solvent (V/V=1/4), stir at 90 degrees Celsius. Then  $\text{KOH}$  (2 mol/L) solution was added to it and stirred until the solution was clear. After acidification treatment with  $\text{HCl}$ , a light yellow powder is obtained. Yield: 112 mg,

65%.  $^1\text{H}$  NMR (300 MHz,  $\text{CDCl}_3$ , TMS):  $\delta$  = 6.59 (d, 1H), 6.61(d, 2H), 6.88(s, 1H), 7.15(d, 3H), 2.20-7.22(d, 2H), 7.35-7.38(q, 4H), 7.75(d, 1H), 8.16(t, 3H), 8.27(d, 1H), 12.28(s, 1H).

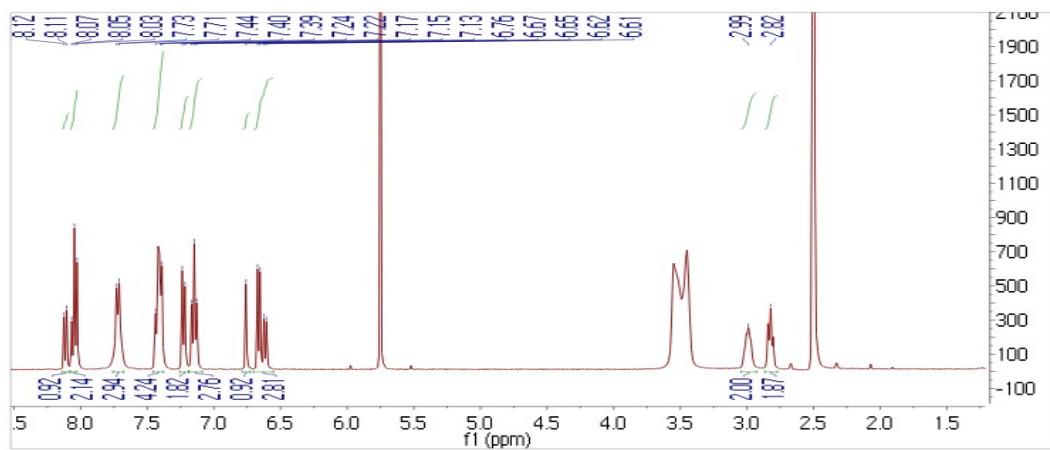

Fig. S1 The <sup>1</sup>H NMR spectrum of the synthesized BSBF-NH<sub>2</sub> molecule.

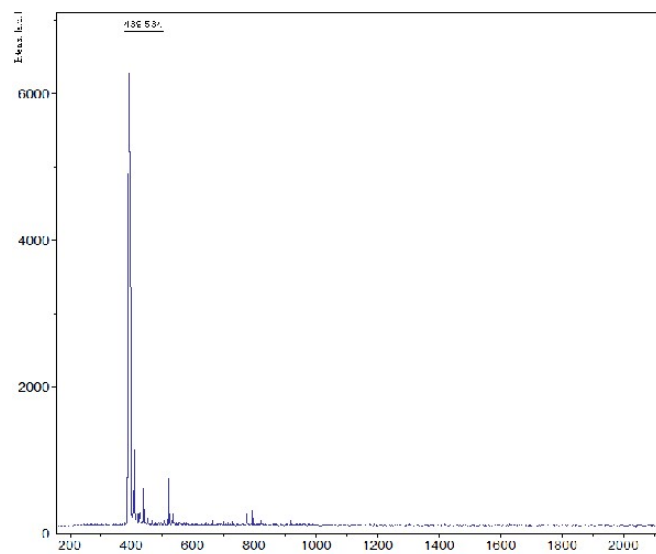

Fig. S2 The MALDI-TOF mass spectrum of synthesized BSBF-NH<sub>2</sub> molecule.

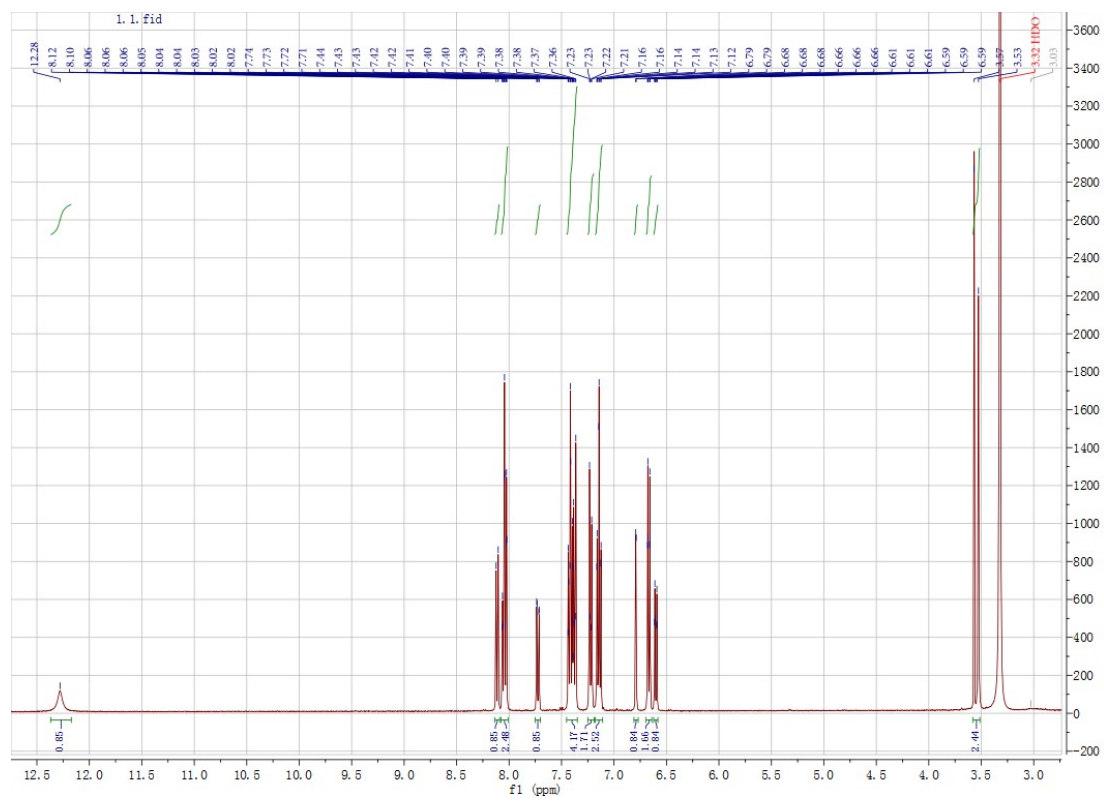

Fig. S3 The <sup>1</sup>H NMR spectrum of the synthesized BSBF-COOH molecule.

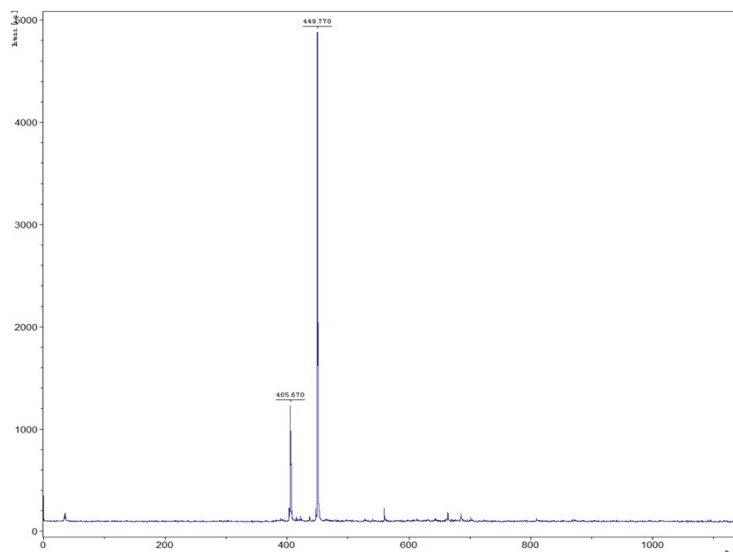

Fig. S4 The MALDI-TOF mass spectrum of synthesized BSBF-COOH molecule.



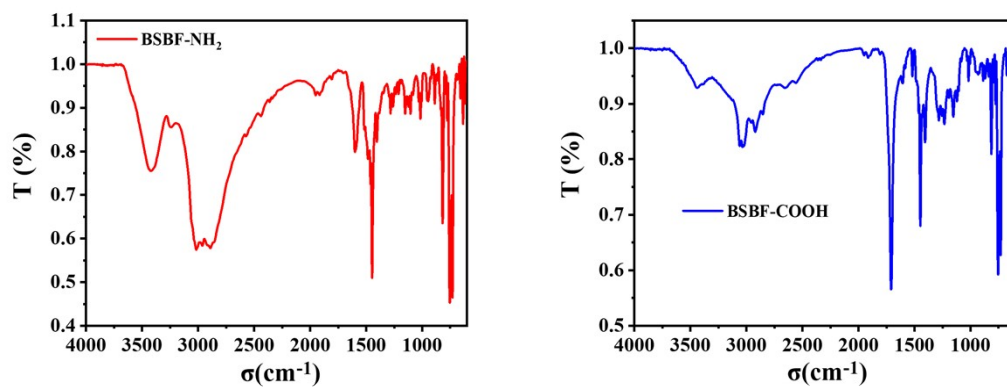

Fig. S5 The Infrared (IR) Spectroscopy of synthesized BSBF-COOH and BSBF-NH<sub>2</sub> molecule.

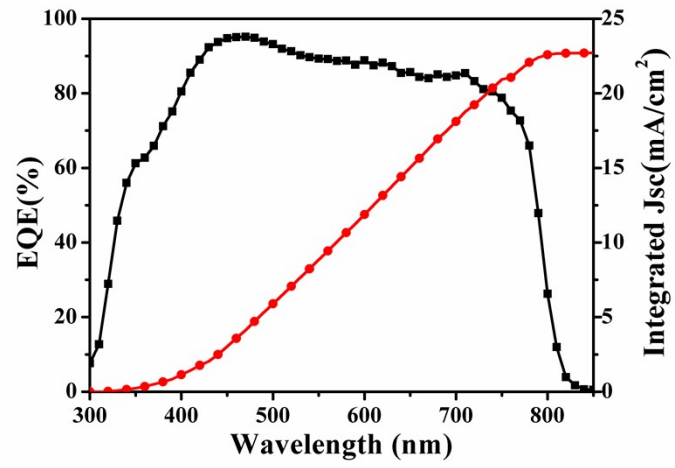

Fig. S6 Incident photon-to-current efficiency (IPCE) of the best performed BSBF-NH<sub>2</sub> passivated PSCs.

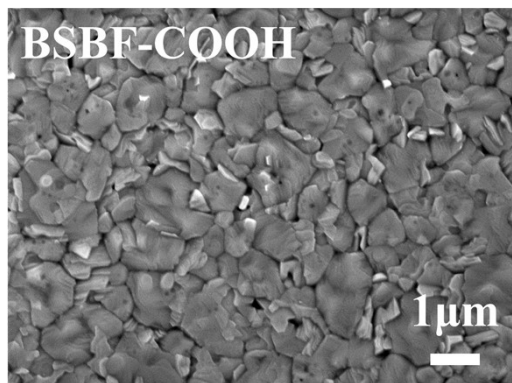

Fig. S7 Top view SEM images of the BSBF-COOH passivated perovskite films.

Table S1. Summary of the characterization for BSBF-NH<sub>2</sub> and BSBF-COOH.

|                  | BSBF-NH <sub>2</sub>                                  | BSBF-COOH                                           |
|------------------|-------------------------------------------------------|-----------------------------------------------------|
| Name             | 2-(4-(9,9'-spirobi[fluoren]-2-yl)phenyl)ethan-1-amine | 2-(4-(9,9'-spirobi[fluoren]-2-yl)phenyl)acetic acid |
| Form             | solid                                                 | solid                                               |
| Colour           | Pale yellow                                           | Pale yellow                                         |
| Chemical formula | C <sub>33</sub> H <sub>25</sub> N                     | C <sub>33</sub> H <sub>22</sub> O <sub>2</sub>      |
| Molecular weight | 435.20                                                | 450.54                                              |
| Melting point    | 191°C                                                 | 138°C                                               |

Table S2. Summary of the photovoltaic parameters for BSBF-NH<sub>2</sub> passivated PSCs.

|             | Jsc (mA/cm <sup>2</sup> ) | Voc (V) | FF   | PCE (%) |
|-------------|---------------------------|---------|------|---------|
| Control     | 23.62                     | 1.07    | 0.73 | 18.45   |
| 1.25 mmol/L | 23.46                     | 1.08    | 0.76 | 19.25   |
| 2.50 mmol/L | 23.67                     | 1.10    | 0.77 | 20.05   |
| 5.00 mmol/L | 23.41                     | 1.08    | 0.74 | 18.71   |

Table S3. Summary of the photovoltaic parameters for BSBF-COOH passivated PSCs.

|             | Jsc (mA/cm <sup>2</sup> ) | Voc (V) | FF   | PCE (%) |
|-------------|---------------------------|---------|------|---------|
| Control     | 23.60                     | 1.06    | 0.73 | 18.26   |
| 1.25 mmol/L | 23.21                     | 1.08    | 0.76 | 19.05   |
| 2.50 mmol/L | 23.12                     | 1.08    | 0.77 | 19.23   |
| 5.00 mmol/L | 23.41                     | 1.08    | 0.75 | 18.21   |

Table S4. PL lifetimes and the corresponding component percentage of the control, BSBF-COOH and BSBF-NH<sub>2</sub> passivated perovskite films obtained by using a biexponential fitting model.

|                      | $\tau_1$ (ns) | $A_1$ (%) | $\tau_2$ (ns) | $A_2$ (%) |
|----------------------|---------------|-----------|---------------|-----------|
| Control              | 2.51          | 32.17     | 212.37        | 67.83     |
| BSBF-COOH            | 2.03          | 26.23     | 323.82        | 73.58     |
| BSBF-NH <sub>2</sub> | 2.02          | 24.40     | 350.61        | 75.60     |

Table S5 Summary of the time constants from fits to the transient absorption data in Figure 4f.

|                      | $\tau_1$ (ps) | $\tau_2$ (ps) |
|----------------------|---------------|---------------|
| Control              | 302           | 2792          |
| BSBF-NH <sub>2</sub> | 139           | 2060          |
